# Supplementary material for: Response of PM 2.5 chemical composition to variations in anthropogenic emissions and meteorological conditions during COVID-19 lockdown
Source: Copernicus journal article supplement (doi:10.5194/egusphere-2023-1851), 2023-09-04
Supplement: Supplementary file 1 [file egusphere-2023-1851-supplement.pdf]

Supplementary Materials

## **Response of PM<sub>2.5</sub> chemical composition to the variation of anthropogenic emission and meteorological conditions during COVID-19 lockdown**

5 YitianGong<sup>1</sup>, HaijunZhou<sup>1,2,3\*</sup>, Xi Chun<sup>1,2,3</sup>, ZhiqiangWan<sup>1,2,3</sup>, Jingwen Wang<sup>1</sup>, Chun Liu<sup>1</sup>

<sup>1</sup>College of Geographical Sciences, Inner Mongolia Normal University, Hohhot 010022, China

<sup>2</sup>Provincial Key Laboratory of Mongolian Plateau's Climate System, Inner Mongolia Normal University, Hohhot 010022, China

<sup>3</sup>Inner Mongolia Repair Engineering Laboratory of Wetland Eco-environment System, Inner Mongolia

10 Normal University, Hohhot 010022, China

*Correspondence to:* Haijun Zhou ([hjzhou@imnu.edu.cn](mailto:hjzhou@imnu.edu.cn))

## Text S1: Data Analysis

The calculations for organic matter (OM), sulfur oxidation rate (SOR), nitrogen oxidation rate (NOR), and secondary organic carbon (SOC) were performed using the following formulas:

$$OM = OC \times 1.6 \quad (1)$$

$$SOR = (SO_4^{2-}) / (SO_4^{2-}) + (SO_2) \quad (2)$$

$$NOR = (NO_3^-) / (NO_3^-) + (NO_2) \quad (3)$$

$$SOC = OC - (OC/EC)_{\min} \times EC \quad (4)$$

where OM, SOR, NOR, and SOC represent organic matter, sulfur oxidation rate, nitrogen oxidation rate, and secondary organic carbon, respectively.

The contribution rates of anthropogenic emissions and meteorological conditions were calculated using Formulas 5 and 6.

$$\text{Contribution}_{\text{meteorology}}(\%) = \frac{C_{\text{observed}} - C_{\text{deweathered}}}{C_{\text{observed}}} \times 100\% \quad (5)$$

$$\text{Contribution}_{\text{emission}}(\%) = 1 - \text{Contribution}_{\text{meteorology}} \quad (6)$$

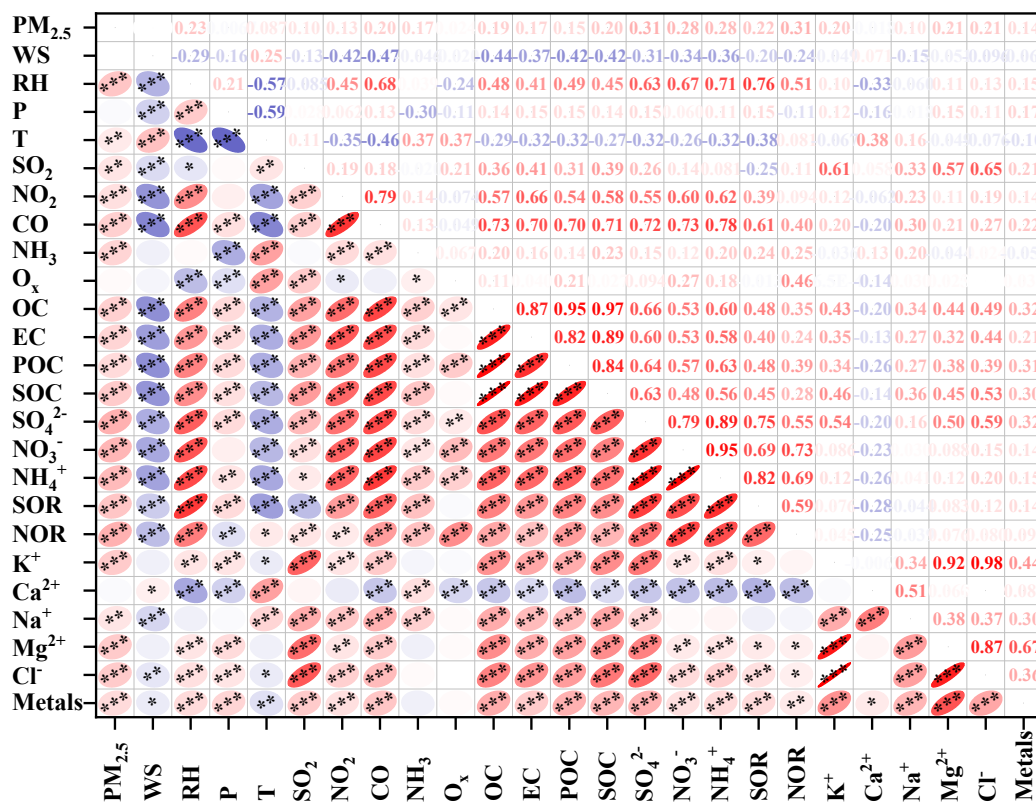

Figure S1. Correlation of aerosol compositions with gaseous pollutants and

meteorological variables during observation. (\* represent  $p \leq 0.05$ , \*\*represent  $p \leq 0.01$ , \*\*\*represent  $p \leq 0.001$ )

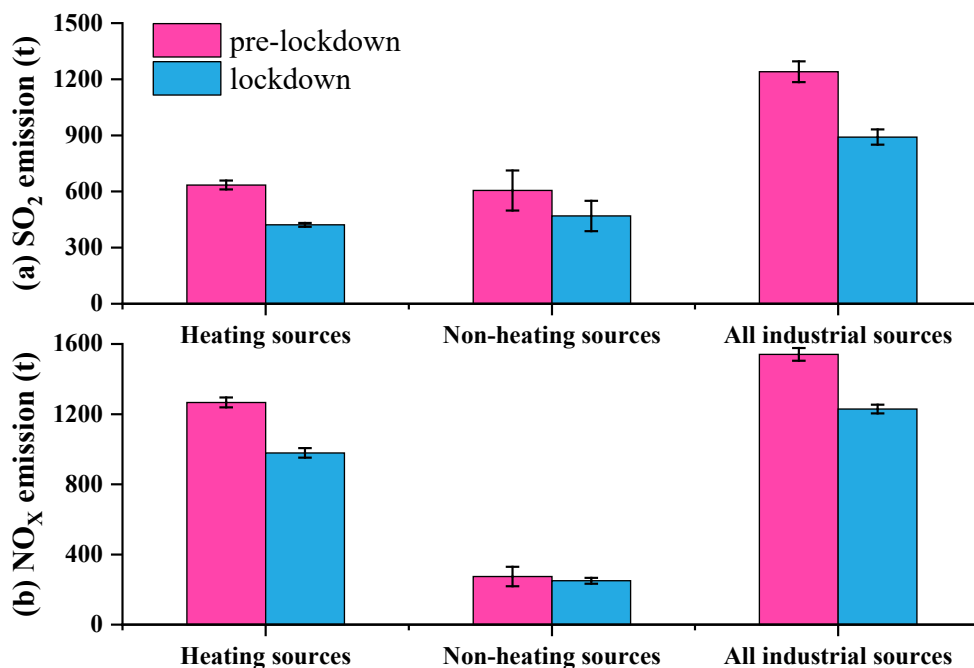

Figure S2. Comparison of (a) SO<sub>2</sub> and (b) NO<sub>x</sub> emissions in different periods

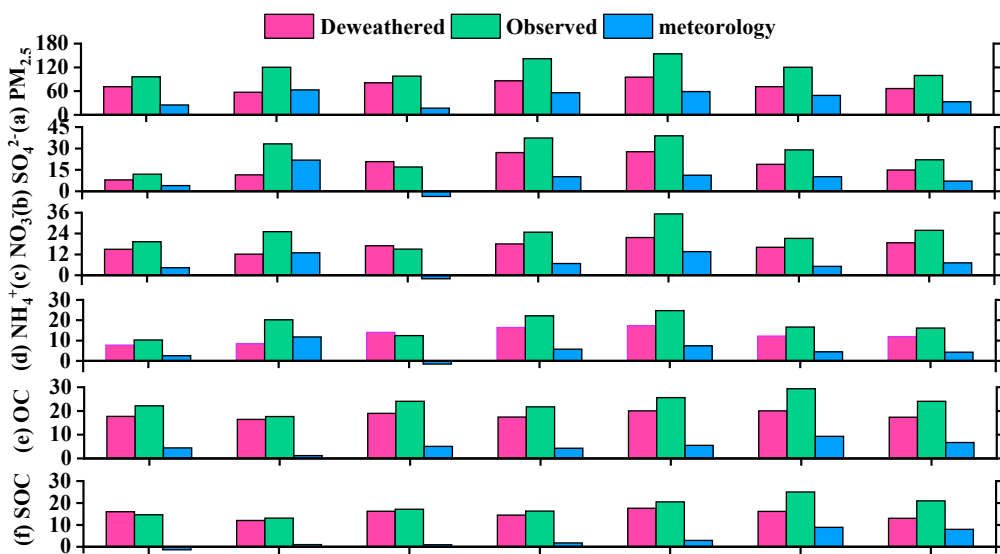

Figure S3. The contribution of anthropogenic emission and meteorological conditions to (a) PM<sub>2.5</sub>, (b) SO<sub>4</sub><sup>2-</sup>, (c) NO<sub>3</sub><sup>-</sup>, (d) NH<sub>4</sub><sup>+</sup>, (e) OC, and (f) SOC during the pollution episodes.

Table S1. Diagnostic index of random forest model

| pollutants                    | dataset   | RMSE  | R    | FAC2 | MB    | MGE   | NMB   | NMGE | COE  | IOA  |
|-------------------------------|-----------|-------|------|------|-------|-------|-------|------|------|------|
| PM <sub>2.5</sub>             | Test data | 18.36 | 0.89 | 0.73 | 0.25  | 12.23 | 0.01  | 0.35 | 0.57 | 0.79 |
|                               | Training  | 16.63 | 0.91 | 0.75 | 0.00  | 11.01 | 0.00  | 0.32 | 0.61 | 0.80 |
| SO <sub>4</sub> <sup>2-</sup> | Test data | 4.13  | 0.92 | 0.75 | 0.03  | 1.90  | 0.01  | 0.33 | 0.66 | 0.83 |
|                               | Training  | 3.12  | 0.95 | 0.76 | -0.01 | 1.63  | 0.00  | 0.29 | 0.70 | 0.85 |
| NO <sub>3</sub> <sup>-</sup>  | Test data | 2.58  | 0.95 | 0.65 | 0.01  | 1.63  | 0.01  | 0.30 | 0.71 | 0.85 |
|                               | Training  | 2.24  | 0.96 | 0.65 | 0.00  | 1.53  | 0.00  | 0.28 | 0.72 | 0.86 |
| NH <sub>4</sub> <sup>+</sup>  | Test data | 1.88  | 0.95 | 0.71 | 0.03  | 1.11  | 0.01  | 0.29 | 0.71 | 0.85 |
|                               | Training  | 1.54  | 0.97 | 0.73 | -0.01 | 0.99  | 0.00  | 0.26 | 0.74 | 0.87 |
| SOC                           | Test data | 5.34  | 0.71 | 0.98 | -0.02 | 1.86  | 0.00  | 0.24 | 0.60 | 0.80 |
|                               | Training  | 2.67  | 0.92 | 0.99 | 0.02  | 1.44  | 0.00  | 0.19 | 0.68 | 0.84 |
| OC                            | Test data | 3.79  | 0.88 | 0.97 | 0.19  | 2.17  | 0.02  | 0.25 | 0.61 | 0.81 |
|                               | Training  | 3.57  | 0.91 | 0.97 | 0.01  | 1.83  | 0.00  | 0.21 | 0.69 | 0.84 |
| SO <sub>2</sub>               | Test data | 5.44  | 0.85 | 0.76 | 0.03  | 3.34  | 0.00  | 0.36 | 0.55 | 0.78 |
|                               | Training  | 4.47  | 0.89 | 0.77 | 0.02  | 2.89  | 0.00  | 0.32 | 0.60 | 0.80 |
| NO <sub>2</sub>               | Test data | 9.79  | 0.88 | 0.90 | -0.30 | 7.11  | -0.01 | 0.26 | 0.58 | 0.79 |
|                               | Training  | 8.27  | 0.91 | 0.91 | -0.01 | 6.03  | 0.00  | 0.22 | 0.64 | 0.82 |
| O <sub>3</sub>                | Test data | 15.52 | 0.93 | 0.95 | -0.17 | 11.94 | 0.00  | 0.15 | 0.66 | 0.83 |
|                               | Training  | 14.39 | 0.95 | 0.96 | 0.04  | 11.05 | 0.00  | 0.14 | 0.69 | 0.84 |
| CO                            | Test data | 0.24  | 0.91 | 0.96 | 0.00  | 0.17  | 0.00  | 0.22 | 0.61 | 0.81 |
|                               | Training  | 0.22  | 0.93 | 0.96 | 0.00  | 0.15  | 0.00  | 0.20 | 0.65 | 0.82 |

Table S2. Variations of chemical compositions in PM<sub>2.5</sub> at different pollution levels

| category     | PM <sub>2.5</sub> | SO <sub>4</sub> <sup>2-</sup> | NO <sub>3</sub> <sup>-</sup> | NH <sub>4</sub> <sup>+</sup> | OC   | EC  | POC | SOC  | SO <sub>2</sub> | NO <sub>2</sub> | CO  | O <sub>3</sub> | T     | WS  | RH | P   |
|--------------|-------------------|-------------------------------|------------------------------|------------------------------|------|-----|-----|------|-----------------|-----------------|-----|----------------|-------|-----|----|-----|
| 0-35         | 20.0              | 3.7                           | 3.3                          | 2.4                          | 8.8  | 1.0 | 1.6 | 7.1  | 12.2            | 20.8            | 0.7 | 93             | -5.7  | 2.3 | 50 | 895 |
| 36-75        | 53.0              | 9.1                           | 9.7                          | 6.5                          | 17.7 | 2.2 | 3.7 | 14.0 | 18.9            | 38.3            | 1.3 | 77             | -5.1  | 1.6 | 59 | 894 |
| 76-115       | 89.4              | 17.1                          | 18.2                         | 12.1                         | 22.4 | 2.8 | 4.9 | 17.5 | 24.4            | 45.8            | 1.7 | 79             | -7.7  | 1.2 | 65 | 896 |
| 116-150      | 134.3             | 36.2                          | 26.5                         | 22.0                         | 26.7 | 2.6 | 4.4 | 22.3 | 12.9            | 41.5            | 1.9 | 74             | -8.9  | 1.0 | 79 | 894 |
| > 150        | 179.9             | 46.2                          | 31.9                         | 26.3                         | 27.4 | 3.7 | 6.4 | 21.1 | 21.9            | 58.8            | 2.3 | 54             | -10.6 | 1.1 | 75 | 895 |
| pre-lockdown | 89.4              | 20.1                          | 17.2                         | 13.1                         | 20.9 | 2.8 | 4.9 | 16.0 | 20.5            | 49.2            | 1.7 | 63             | -9.8  | 1.4 | 65 | 895 |
| lockdown     | 58.3              | 12.8                          | 10.4                         | 7.7                          | 17.5 | 1.3 | 2.2 | 15.3 | 17.7            | 24.9            | 1.2 | 106            | -4.5  | 1.8 | 54 | 895 |
